# Supplementary material for: Stimulus-specific adaptation in a recurrent network model of primary auditory cortex
Source: PLoS Comput Biol. 2017 Mar 13;13(3):e1005437. doi: 10.1371/journal.pcbi.1005437 (PMC5367837; doi:10.1371/journal.pcbi.1005437)
Supplement: S3 Data — (XLSX) [file pcbi.1005437.s005.xlsx]

## Sheet: Sheet1
ISI (s)	CSI		Attenuation (dB)	CSI
0.3	0.0297682		30	0.287003
0.3	0.0944066		30	0.166754
0.3	0.80469		30	0.132232
0.3	0.0312128		30	0.185111
0.3	0.601244		40	0.364996
0.3	0.731131		40	0.473803
0.3	0.183613		30	0.181385
0.3	0.16848		30	0.152006
0.3	0.179857		30	0.148007
0.3	0.57441		30	0.352572
0.3	0.522465		30	0.369081
0.3	0.540699		30	0.43064
0.3	0.335039		30	0.55558
0.3	0.363979		30	0.494898
0.3	0.736778		30	0.477596
0.3	0.868632		30	0.291236
0.3	0.393386		30	0.312627
0.3	0.782622		30	0.273166
0.3	0.626495		30	0.712322
0.3	0.581003		30	0.624391
0.3	0.366369		30	0.589806
0.3	0.839169		30	0.712692
0.3	0.703736		30	0.553315
0.3	0.0736238		30	0.571154
0.3	0.186724		30	0.494006
0.3	0.286517		50	0.408539
0.3	0.278233		50	0.630173
0.3	0.384475		50	0.573059
0.3	0.419782		50	0.587607
0.3	0.654372		50	0.572804
0.3	0.660363		50	0.623991
0.3	0.709607		50	0.498609
0.3	0.025376		50	0.430809
0.3	0.463274		50	0.622755
0.3	0.640008		50	0.541847
0.3	0.640008		50	0.60612
0.3	0.925174		50	0.567423
0.3	0.509455		50	0.458399
0.3	0.581483		50	0.494922
0.3	0.255928		30	0.373667
0.3	0.28119		30	0.364306
0.3	0.225445		30	0.508478
0.3	0.114223		30	0.555753
0.3	0.730438		30	0.397144
0.3	0.331533		30	0.707052
0.3	0.401675		30	0.446051
0.3	0.41806		30	0.520581
0.7	0.098682		30	0.776017
0.7	0.0826351		30	0.21597
0.7	0.158028		30	0.295599
0.7	0.161447		30	0.393774
0.7	0.0602026		60	0.694592
0.7	0.183011		60	0.771762
0.7	0.413376		60	0.773698
0.7	0.0788158		60	0.588039
0.7	0.0205777		60	0.639815
0.7	0.0285201		60	0.696438
0.7	0.187384		60	0.860357
0.7	-9.69958e-05		40	0.462951
0.7	-0.0704477		40	0.365505
0.7	0.216839		40	0.402336
0.7	0.044422		40	0.287036
0.7	0.107116		40	0.491561
0.7	0.243297		40	0.400404
0.7	-0.0418314		40	0.384172
0.7	0.124198		40	0.351972
0.7	0.139878		40	0.298955
0.7	0.237325		40	0.360295
0.7	0.207643		30	0.462733
0.7	0.0406141		30	0.396192
0.7	0.247638		30	0.323621
1.2	0.0888233		40	0.463289
1.2	0.054739		40	0.534545
1.2	0.0289741		20	0.280216
1.2	0.0203873		20	0.171568
1.2	0.0377653		20	0.577498
1.2	-0.0603519		20	0.375265
1.2	-0.0208865		30	-0.00320725
1.2	0.191513		30	-0.0910199
			30	-0.163704
			30	0.0376515
			30	0.31025
			30	0.316049
			30	0.233294
			30	0.270681
			30	0.338715
			30	0.446922
			30	0.447338
			30	0.252945
			30	0.638822
			30	0.479322
			30	0.436181
			30	0.273636
			30	0.707946
			30	0.529769
			30	0.559828
			30	0.534447
			30	0.351239
			30	0.24258
			30	0.303834
			30	0.567992
			20	0.416006
			20	0.0546047
			20	0.0247604
			20	0.189655
			20	0.107798
			40	0.587366
			30	0.44673
			50	0.522523
			40	0.168831
			40	0.187125
			50	0.645712
